# Supplementary material for: Surface polarization enhancement: high catalytic performance of Cu/CuOx/C nanocomposites derived from Cu-BTC for CO oxidation
Source: Royal Society of Chemistry journal article supplement (doi:10.1039/c6ta01199c), 2016-01-01
Supplement: c6ta01199c1.pdf [file c6ta01199c1.pdf]

# Surface polarization enhancement: high catalytic performance of Cu/CuO<sub>x</sub>/C nanocomposites derived from Cu-BTC for CO oxidation

Ruirui Zhang,<sup>†</sup> Lin Hu,<sup>‡</sup> Shouxin Bao,<sup>†</sup> Ran Li,<sup>†</sup> Lei Gao,<sup>‡</sup> Ren Li,<sup>†</sup> Qianwang Chen<sup>\*†‡</sup>

<sup>†</sup>Hefei National Laboratory for Physical Sciences at Microscale and Department of Materials Science & Engineering, University of Science and Technology of China, Hefei, China.

<sup>‡</sup>High Magnetic Field Laboratory, Hefei Institutes of Physical Science, Chinese Academy of Sciences, Hefei, Anhui 230031, P. R. China.

\*To whom correspondence should be addressed. Telephone: +86-551-63607251.

Fax: +86-551-63603005. E-mail: [cqw@ustc.edu.cn](mailto:cqw@ustc.edu.cn)

**Computational methods:** The Vienna AB-initio Simulation Package (VASP) code has been used for our calculations<sup>1</sup>. This code solves the Kohn-Sham equations of density functional theory (DFT) using a plane-wave basis set and the projector augmented wave (PAW) method<sup>2</sup>. The exchange and correlation effects were calculated by the generalized gradient approximation in the formulation of Perdew-Wang-91. To ensure the accuracy of the calculated results, the cutoff energy was set to 400 eV for the plane-wave expansion of the electronic wave function. All structures were optimized with a convergence criterion of  $1 \times 10^{-5}$  eV for the energy and 0.01 eV/Å for the forces.

Two models contain 4 layers of Cu (200) and an in-plane periodicity of (4\*4) Cu<sub>2</sub>O layer or CuO layer, which are built for representing the oxidized surface and in-situ obtained copper oxide according to our HRTEM image. The Gamma scheme with 5x5x1 K point mesh is used to represent the Brillouin zone.

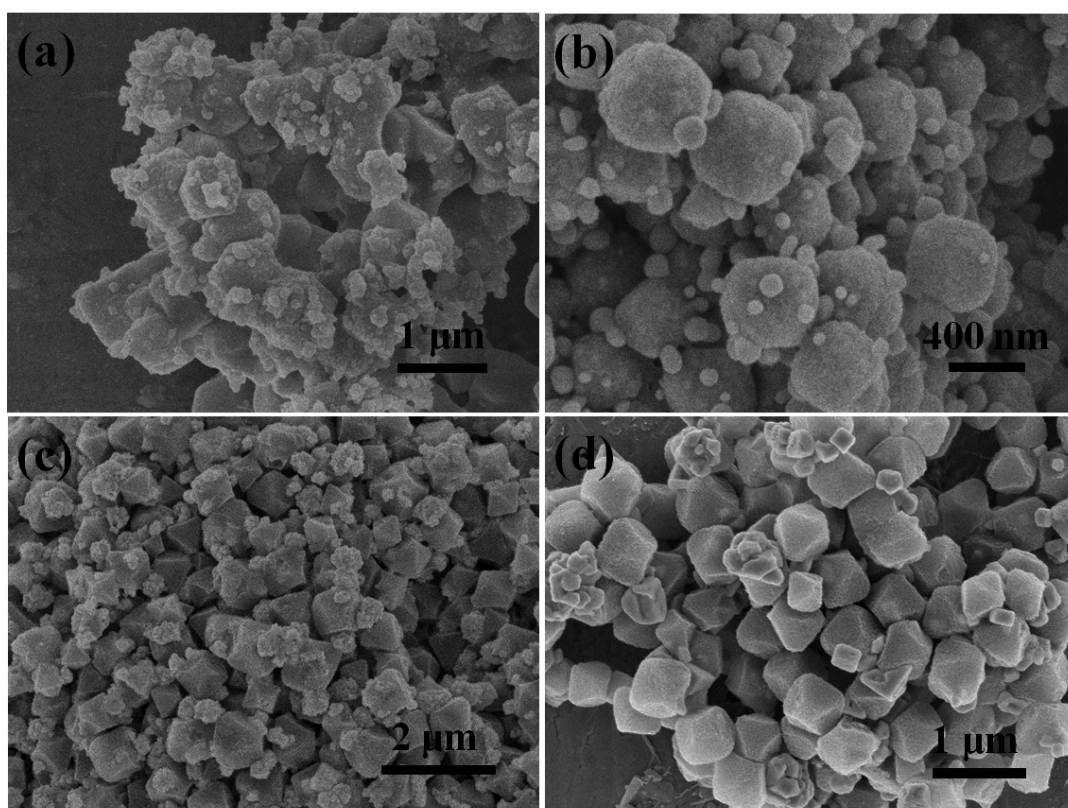

**Fig. S1** SEM images of Cu-BTC annealed at: (a) 350 °C (b) 400 °C (c) 600 °C (d) 700 °C

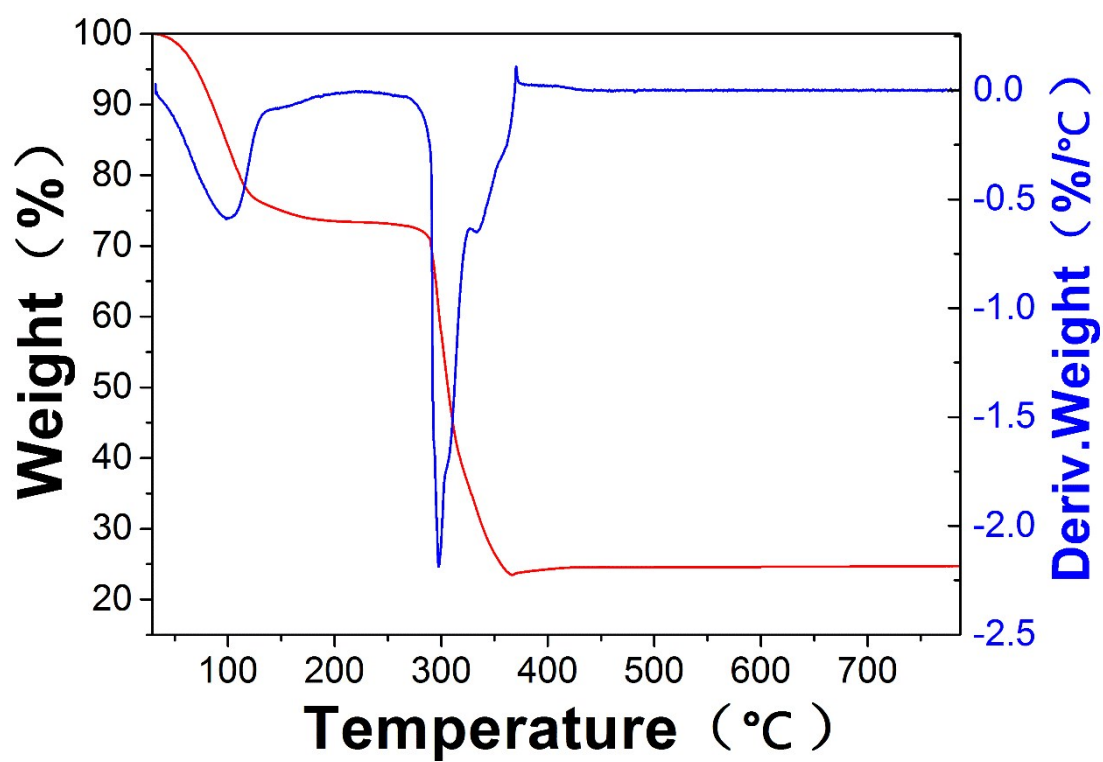

**Fig. S2** TG-DTA curves of Cu-BTC under a flow of N<sub>2</sub> with a heating rate of 20°C min<sup>-1</sup>.

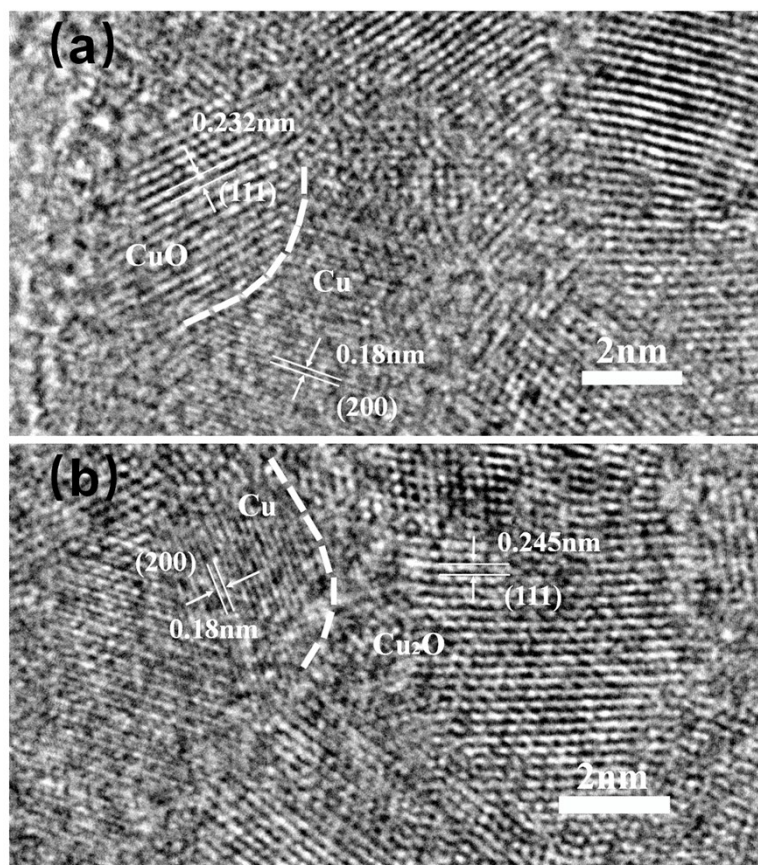

**Fig. S3** HRTEM images of (a) Cu-CuO interface; (b) Cu-Cu<sub>2</sub>O interface

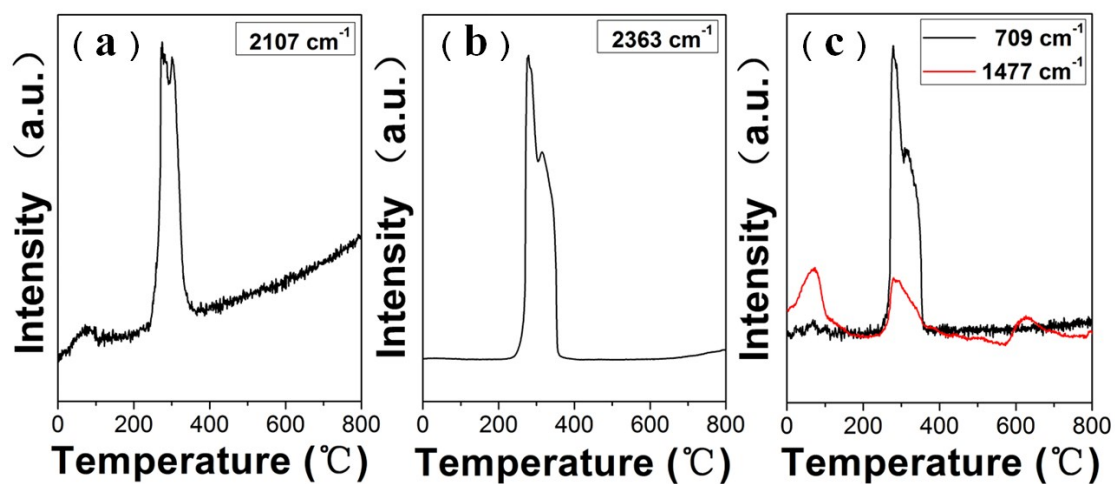

**Fig. S4** IR absorbance variation of (a) CO, (b) CO<sub>2</sub>, (c) C<sub>6</sub>H<sub>6</sub> as a function of temperature.

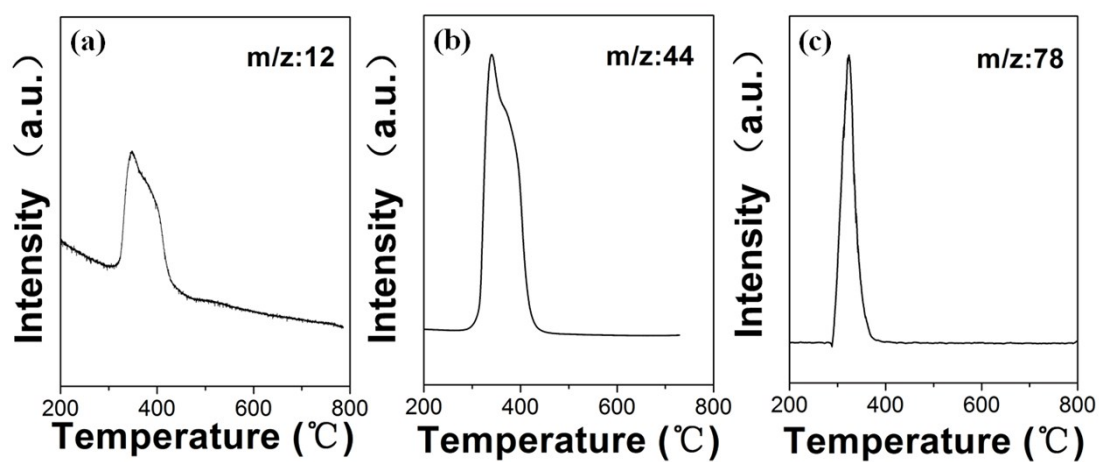

**Fig. S5** MS intensity variation of (a) CO, (b) CO<sub>2</sub>, (c) C<sub>6</sub>H<sub>6</sub> as a function of temperature.

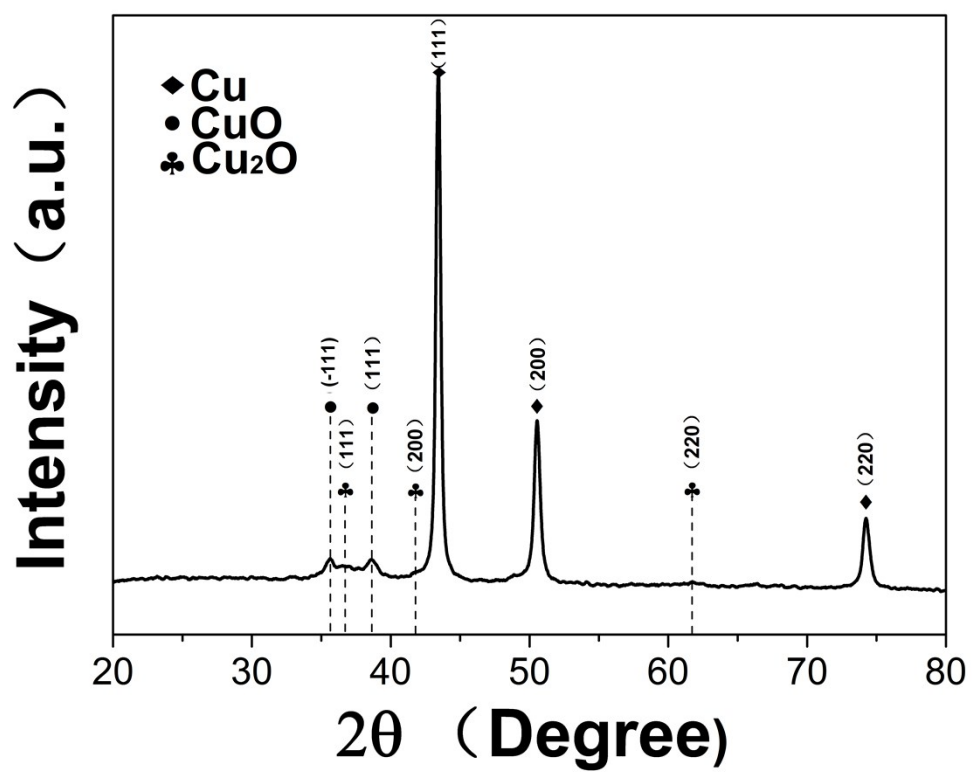

**Fig. S6** XRD patterns of the as-prepared sample obtained at 500°C

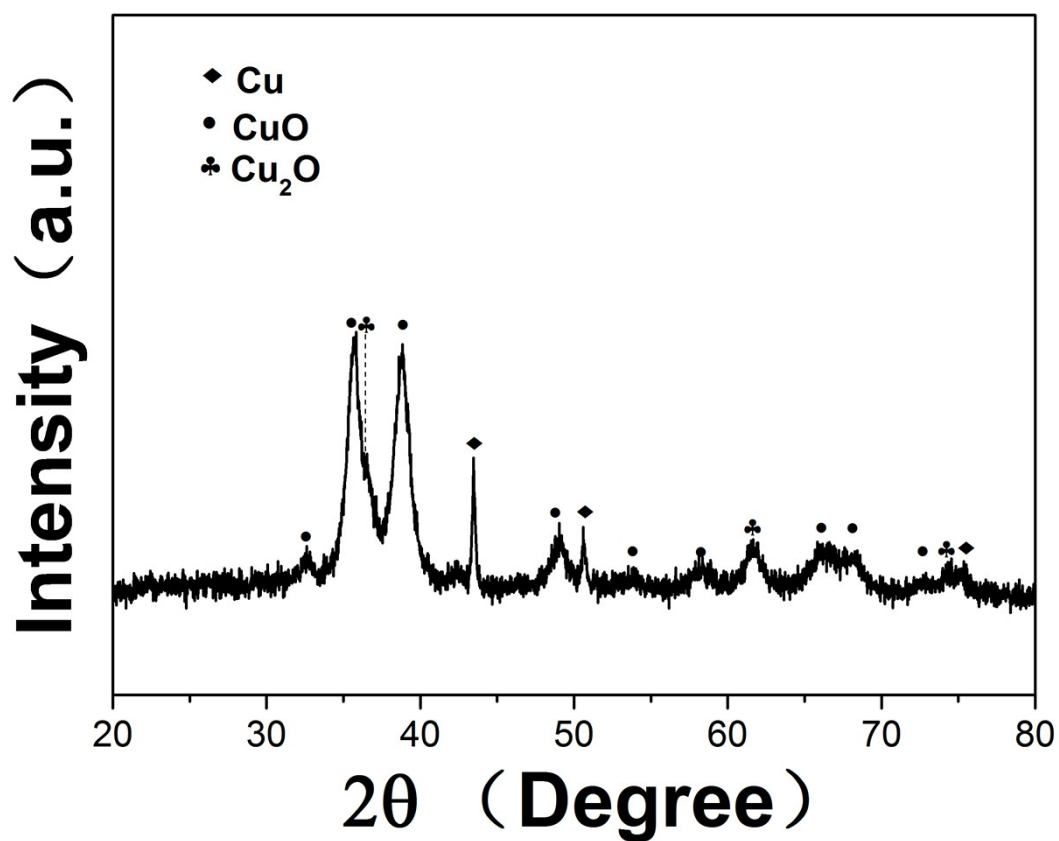

**Fig. S7** XRD patterns of the as-prepared sample after being tested in 1% CO with space velocity of 36,000 mL g<sup>-1</sup> h<sup>-1</sup> at the temperature of 155°C for 48h

**Table 1** Performance of S-500 and reported literatures

| Catalyst                        | CO/% | T <sub>100</sub> /°C | Ref.                                                         |
|---------------------------------|------|----------------------|--------------------------------------------------------------|
| Cu <sub>2</sub> O               | 1    | >240                 | <i>Angew. Chem. Int. Ed.</i> , 2011, <b>50</b> , 12294–12298 |
| Cu <sub>2</sub> O               | 1    | >220                 | <i>J. Mater. Chem. A</i> , 2013, <b>1</b> , 282–287          |
| CuO                             | 4    | >183                 | <i>J. Mater. Chem. A</i> , 2015, <b>3</b> , 3627–3632        |
| Cu <sub>2</sub> O/CuO composite | 3.7  | >240                 | <i>J. Mater. Chem. A</i> , 2015, <b>3</b> , 5294–5298        |
| S-500                           | 1    | 155                  | This work                                                    |
| S-500                           | 5    | 155                  | This work                                                    |



## XPS

Deconvolution of the original Cu LMM peaks were performed, obtaining three symmetrical peaks centered at near 916.7, 917.8 and 919.8 eV, corresponding to  $\text{Cu}^+$ ,  $\text{Cu}^{2+}$  and  $\text{Cu}^0$  species, respectively.<sup>3-6</sup> The deconvolution results were listed in Table 2.

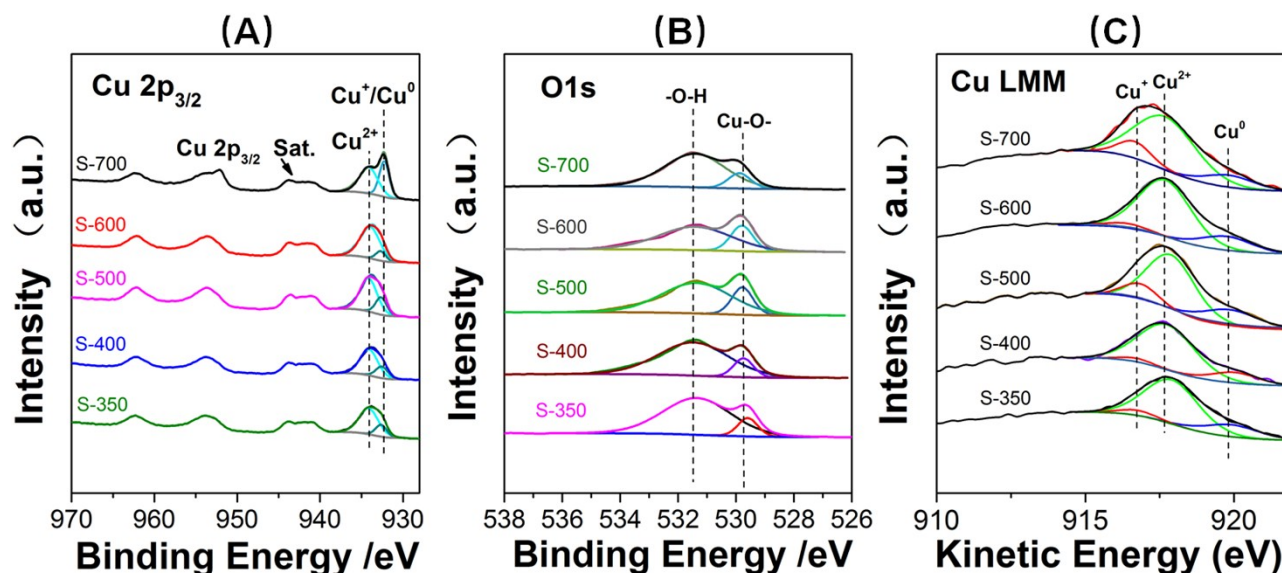

**Fig. S8** X-ray photoelectron (A, B) and Auger spectra (C) of the samples annealed at different temperatures.

**Table 2.** Summary of the Cu LMM peak-fitting results

| Sample           | S-350    |       | S-400    |       | S-500    |       | S-600    |       | S-700    |       |
|------------------|----------|-------|----------|-------|----------|-------|----------|-------|----------|-------|
|                  | K.E.[eV] | At.%  |
| $\text{Cu}^0$    | 919.93   | 19.34 | 920.13   | 15.35 | 919.87   | 19.45 | 919.74   | 19.76 | 919.85   | 13.15 |
| $\text{Cu}^+$    | 916.75   | 3.29  | 916.78   | 3.55  | 916.85   | 14.07 | 916.39   | 9.6   | 916.66   | 12.65 |
| $\text{Cu}^{2+}$ | 917.91   | 77.37 | 917.83   | 81.1  | 917.88   | 66.48 | 917.69   | 70.63 | 917.69   | 74.21 |



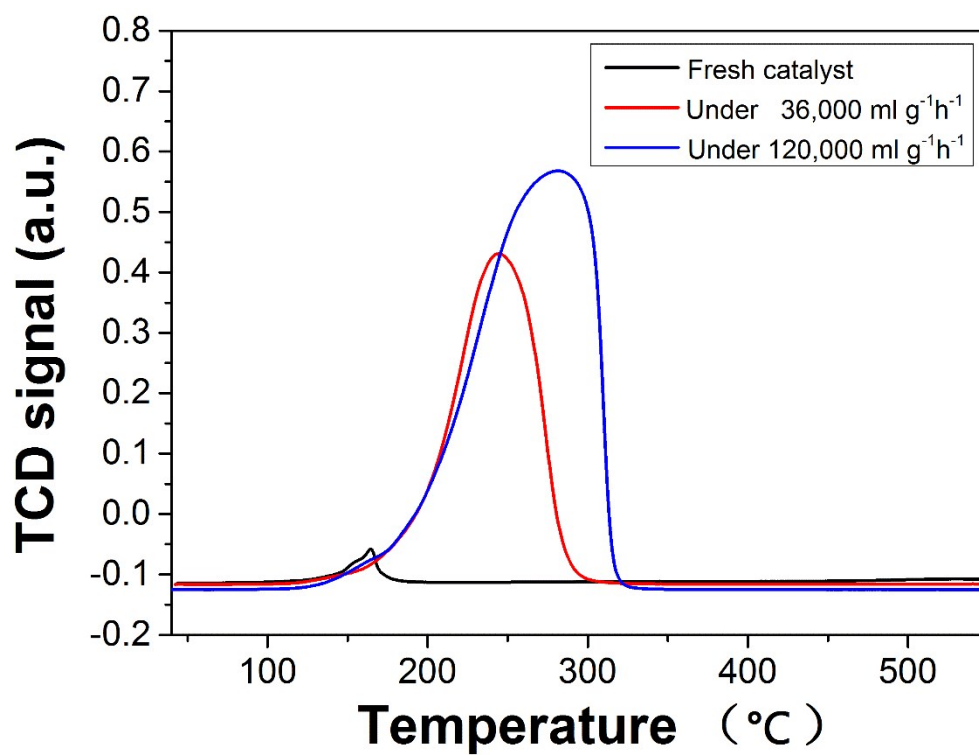

**Fig. S9** TPR profiles of fresh S-500 and used at different space velocities

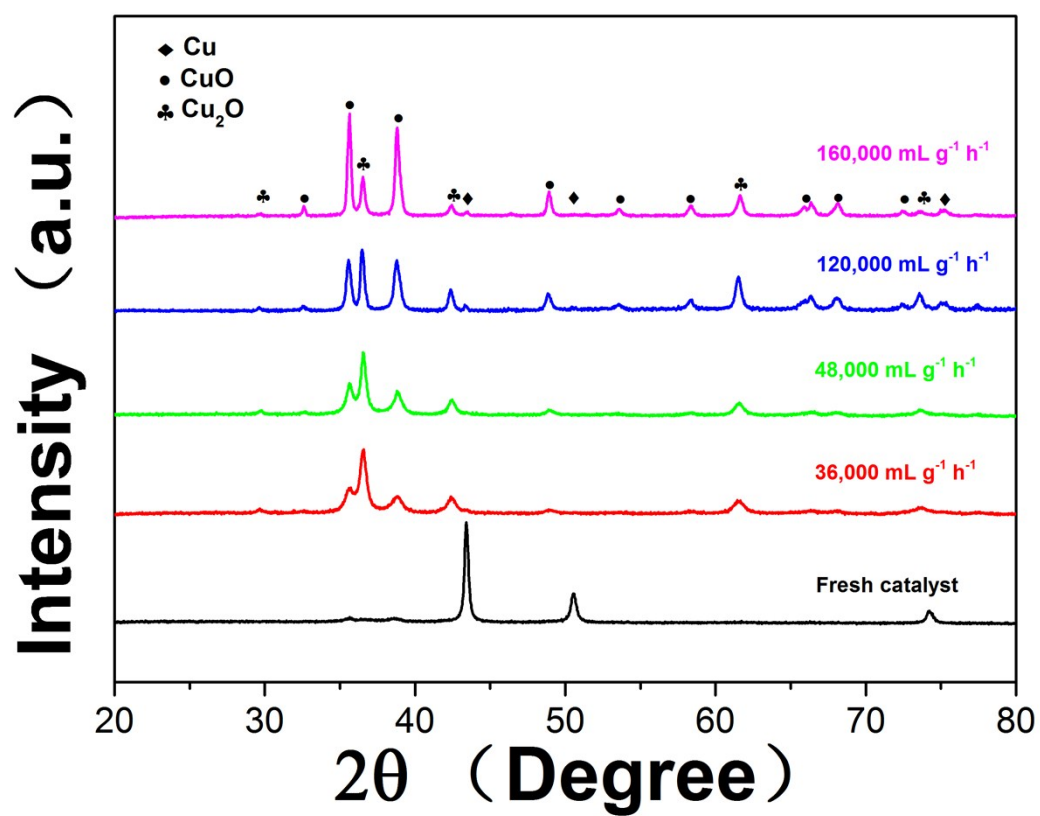

**Fig. S10** XRD patterns of fresh catalyst and spent catalysts at the three space velocities

## REFERENCES

1. F. J. Kresse G, *Computational Materials Science*, 1996, **6**, 15-50.
2. G. Kresse and D. Joubert, *Physical Review B*, 1999, **59**, 1758-1775.
3. J. Li, Z. Mei, L. Liu, H. Liang, A. Azarov, A. Kuznetsov, Y. Liu, A. Ji, Q. Meng and X. Du, *Scientific reports*, 2014, **4**, 7240
4. J. Słoczyński, R. Grabowski, P. Olszewski, A. Kozłowska, J. Stoch, M. Lachowska and J. Skrzypek, *Applied Catalysis A: General*, 2006, **310**, 127-137.
5. Y.-W. Suh, S.-H. Moon and H.-K. Rhee, *Catalysis today*, 2000, **63**, 447-452.
6. J.-S. Tsay, A. Yang, C. Wu and F. Shiu, *Surface Science*, 2007, **601**, 4265-4269.
